# Supplementary material for: Development and calibration of an integrative passive sampler for monitoring vinyl chloride monomer in drinking water networks
Source: Royal Society of Chemistry journal article supplement (doi:10.1039/d2ew00036a), 2022-01-01
Supplement: d2ew00036a1.pdf [file d2ew00036a1.pdf]

## SUPPORTING INFORMATION

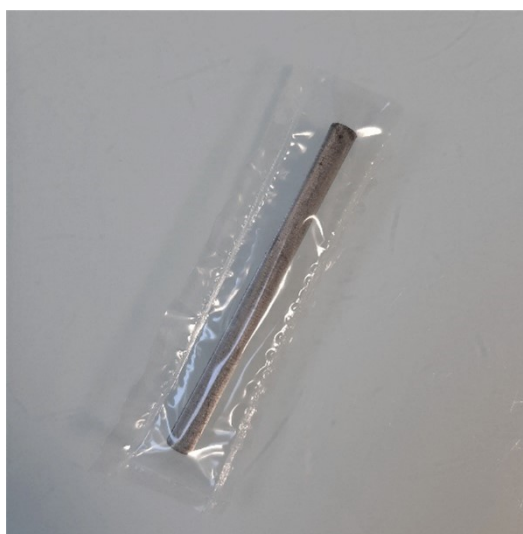

FIGURE S 1: PASSIVE SAMPLER

| <b>SHS</b>                  |                                                                                  |
|-----------------------------|----------------------------------------------------------------------------------|
| <b>Incubation</b>           | 10 min, 65°C, with agitation                                                     |
| <b>Injection volume</b>     | 0.8 ml                                                                           |
| <b>TD</b>                   |                                                                                  |
| <b>Dry purge</b>            | N <sub>2</sub> , 3 min, 50 ml.min <sup>-1</sup>                                  |
| <b>Primary desorption</b>   | 10 min, 280°C, 80 ml.min <sup>-1</sup> , 30 ml.min <sup>-1</sup> split           |
| <b>Secondary desorption</b> | 1 min purge, 50 ml.min <sup>-1</sup> , 40°C–300°C, >40°C.s <sup>-1</sup> , 5 min |
| <b>GC</b>                   |                                                                                  |
| <b>Inlet</b>                | Split 1/10, 250°C                                                                |
| <b>Column</b>               | TR-V1, 60 m x 0.25 mm x 1.4 μm                                                   |
| <b>Gas</b>                  | He, 1 ml.min <sup>-1</sup>                                                       |
| <b>Oven</b>                 | 50°C to 150°C, 10°C.min <sup>-1</sup>                                            |
| <b>MS transfer line</b>     | 230°C                                                                            |
| <b>MS</b>                   |                                                                                  |
| <b>Source temperature</b>   | 230°C                                                                            |
| <b>Scan</b>                 | 50–250 m/z                                                                       |
| <b>SRM</b>                  | 62 > 27; 64 > 27; 65 > 30; 10 eV                                                 |

FIGURE S 2: PARAMETERS FOR ANALYSIS OF VCM

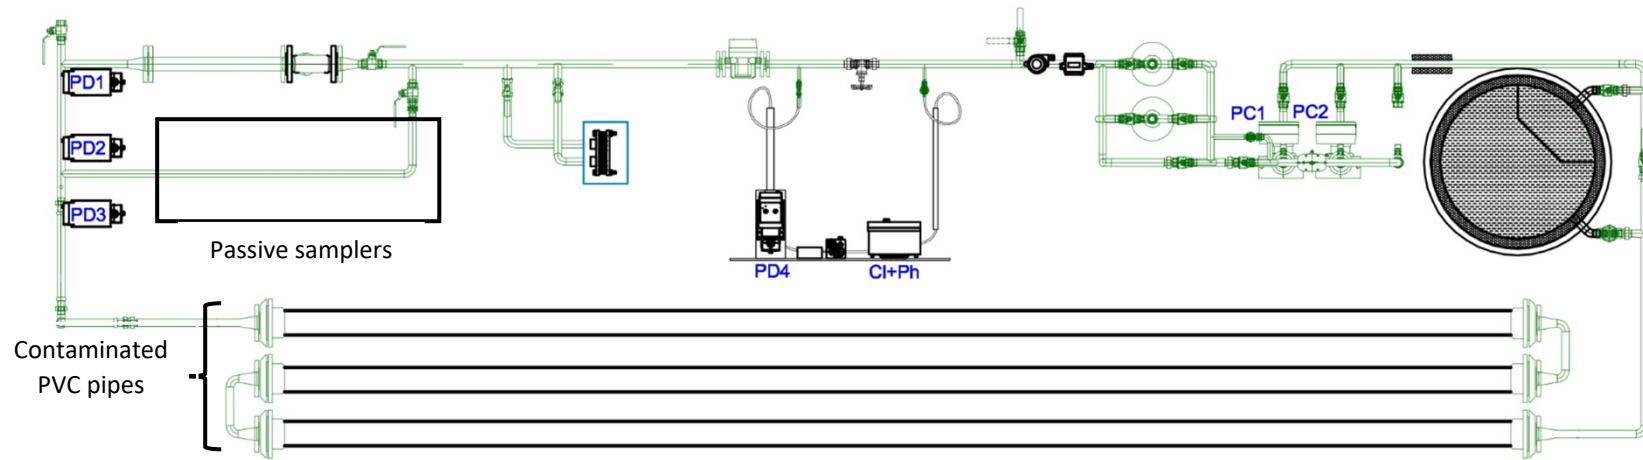

FIG. S 3: HYDRAULIC PILOT USED FOR CALIBRATION OF PASSIVE SAMPLERS

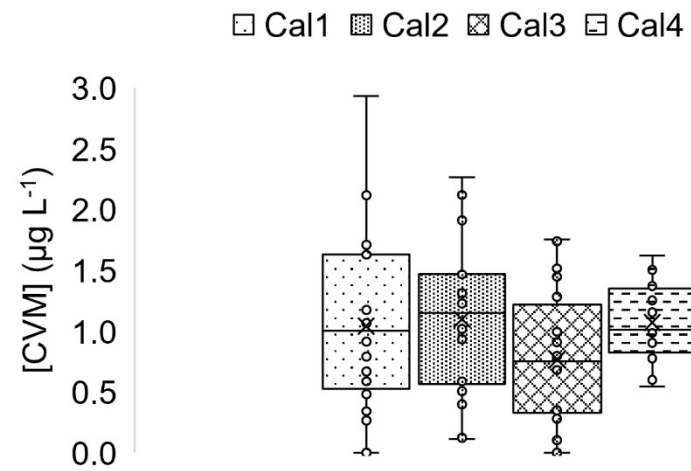

FIG. S 4: VCM CONCENTRATIONS IN WATER FOR THE FOUR CALIBRATION REPLICATES

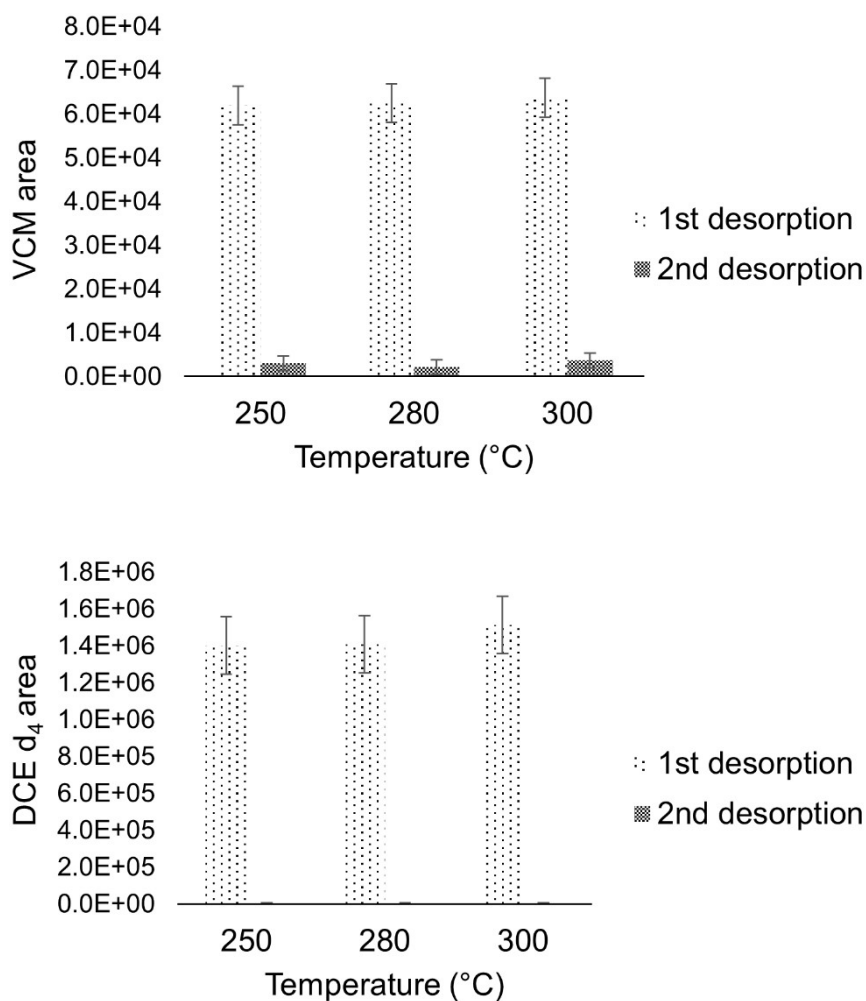

FIG. S 5: THERMAL DESORPTION TEMPERATURE COMPARISON FOR VCM AND ITS INTERNAL STANDARD AT A FIXED DESORPTION TIME OF 5 MIN AND DESORPTION FLOW OF 50 ML.MIN<sup>-1</sup>

| Desorption temperature °C | VCM response area |                    |                |                    | Internal standard area |                    |                |                    |
|---------------------------|-------------------|--------------------|----------------|--------------------|------------------------|--------------------|----------------|--------------------|
|                           | 1st desorption    | standard deviation | 2nd desorption | standard deviation | 1st desorption         | standard deviation | 2nd desorption | standard deviation |
| 250                       | 61956             | 981                | 3046           | 1971               | 1400236                | 78022              | 4171           | 419                |
| 280                       | 62397             | 5426               | 2101           | 1064               | 1407659                | 104057             | 3871           | 671                |
| 300                       | 63684             | 6880               | 3657           | 1993               | 1511295                | 283920             | 4115           | 1002               |

FIG. S 6: ANALYTE AND INTERNAL STANDARD RESPONSE AREAS FOR 3 TEMPERATURES AND 2 DESORPTIONS

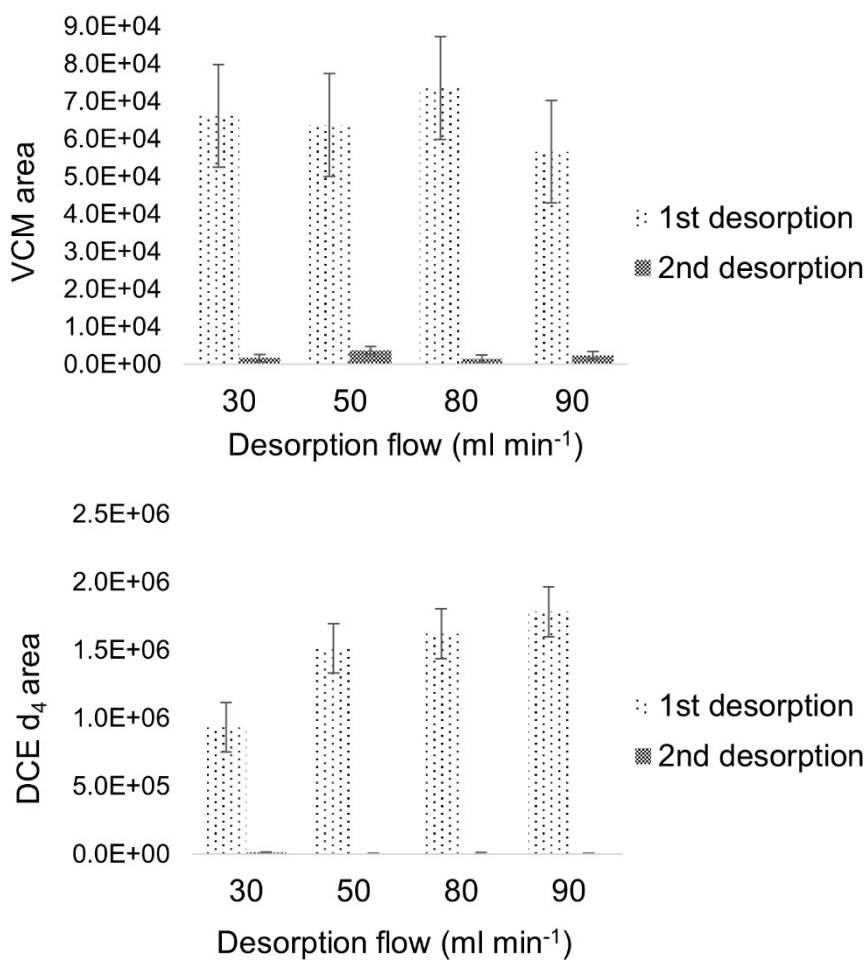

FIG. S 7: THERMAL DESORPTION FLOW COMPARISON FOR VCM AND ITS INTERNAL STANDARD AT A FIXED DESORPTION TEMPERATURE OF 300°C AND DESORPTION FLOW OF 50 ML.MIN<sup>-1</sup>

| Desorption flow ml/min | VCM area       |                    |                |                    | Internal standard area |                    |                |                    |
|------------------------|----------------|--------------------|----------------|--------------------|------------------------|--------------------|----------------|--------------------|
|                        | 1st desorption | standard deviation | 2nd desorption | standard deviation | 1st desorption         | standard deviation | 2nd desorption | standard deviation |
| 30                     | 66044          | 19794              | 1651           | 274                | 932135                 | 118291             | 11314          | 11638              |
| 50                     | 63684          | 6880               | 3657           | 1993               | 1511295                | 283920             | 4115           | 1002               |
| 80                     | 73513          | 17841              | 1471           | 452                | 1618296                | 133704             | 5468           | 2087               |
| 90                     | 56614          | 10207              | 2303           | 1233               | 1780637                | 195266             | 2377           | 1787               |

FIG. S 8: ANALYTE AND INTERNAL STANDARD RESPONSE AREAS FOR 4 FLOWS AND 2 DESORPTIONS

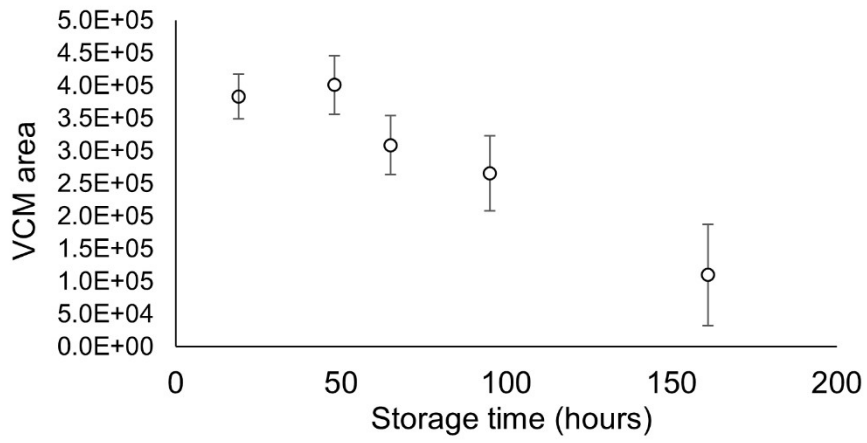

FIG. S 9: ANALYTE STABILITY IN THE DESORPTION TUBES DURING STORAGE

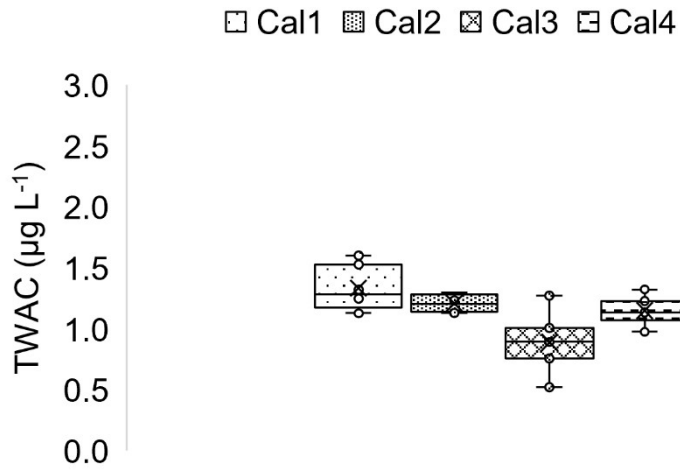

FIG. S 10: AVERAGE CONCENTRATIONS OF VCM MEASURED BY SPOT SAMPLING DURING CALIBRATION

```

Call:
lm(formula = lnFC ~ lnt)

Residuals:
    Min       1Q   Median       3Q      Max
-0.26613 -0.12148 -0.00769  0.07342  0.47402

Coefficients:
            Estimate Std. Error t value Pr(>|t|)
(Intercept) -7.41012    0.13617  -54.42  <2e-16 ***
lnt          1.00985    0.03004   33.61  <2e-16 ***
---
Signif. codes:  0 '***' 0.001 '**' 0.01 '*' 0.05 '.' 0.1 ' ' 1

Residual standard error: 0.1646 on 29 degrees of freedom
Multiple R-squared:  0.975,    Adjusted R-squared:  0.9741
F-statistic: 1130 on 1 and 29 DF,  p-value: < 2.2e-16

Analysis of Variance Table

Response: lnFC
            Df Sum Sq Mean Sq F value    Pr(>F)
lnt          1 30.6281 30.6281  1129.9 < 2.2e-16 ***
Residuals  29  0.7861  0.0271
---
Signif. codes:  0 '***' 0.001 '**' 0.01 '*' 0.05 '.' 0.1 ' ' 1

```

FIG. S 11: RESULTS OF THE ANOVA PERFORMED FOR THE PS CALIBRATION

```

Call:
lm(formula = lnk ~ invtemp, data = donnees_rs_all_temp)

Residuals:
    1      2      3
-0.03789  0.01959  0.01830

Coefficients:
            Estimate Std. Error t value Pr(>|t|)
(Intercept)  12.7914    0.9615   13.30  0.0478 *
invtemp     -5885.1830  281.4057  -20.91  0.0304 *
---
Signif. codes:  0 '***' 0.001 '**' 0.01 '*' 0.05 '.' 0.1 ' ' 1

Residual standard error: 0.04642 on 1 degrees of freedom
Multiple R-squared:  0.9977,    Adjusted R-squared:  0.9954
F-statistic: 437.4 on 1 and 1 DF,  p-value: 0.03042

```

FIG. S 12: RESULTS PERFORMED TO ESTIMATE THE INFLUENCE OF TEMPERATURE ON RS

```

Call:
lm(formula = rs ~ debit, data = donnees_rs_all_deb)

Residuals:
    1      2      3      4      5 
2.723e-05 -1.977e-05 -5.770e-06 -1.689e-05  1.520e-05

Coefficients:
            Estimate Std. Error t value Pr(>|t|)
(Intercept)  2.518e-04  1.761e-05  14.295 0.000742 ***
debit       -1.177e-07  2.960e-07  -0.398 0.717540
---
Signif. codes:  0 '***' 0.001 '**' 0.01 '*' 0.05 '.' 0.1 ' ' 1

Residual standard error: 2.368e-05 on 3 degrees of freedom
(1 observation effacée parce que manquante)
Multiple R-squared:  0.05005, Adjusted R-squared:  -0.2666
F-statistic: 0.1581 on 1 and 3 DF, p-value: 0.7175

> anova(reg_rs_deb)
Analysis of Variance Table

Response: rs
          Df      Sum Sq   Mean Sq F value Pr(>F)
debit      1  8.8630e-11  8.8630e-11  0.1581 0.7175
Residuals  3  1.6822e-09  5.6072e-10

```

FIG. S 13: RESULTS OF THE ANOVA PERFORMED TO ESTIMATE THE INFLUENCE OF FLOW VELOCITY ON RS

```

Call:
lm(formula = rs ~ temperature + debit, data = donnees_rs_all)

Residuals:
    1      2      3      4      5      6      7      8 
3.490e-06 -4.351e-05 -2.961e-05  1.539e-05 -1.838e-05  2.804e-05  1.654e-05  2.804e-05

Coefficients:
            Estimate Std. Error t value Pr(>|t|)
(Intercept) -1.008e-04  5.154e-05  -1.957 0.107763
temperature  1.756e-05  2.281e-06  7.701 0.000589 ***
debit        2.139e-07  3.641e-07  0.587 0.582498
---
Signif. codes:  0 '***' 0.001 '**' 0.01 '*' 0.05 '.' 0.1 ' ' 1

Residual standard error: 3.226e-05 on 5 degrees of freedom
Multiple R-squared:  0.9227, Adjusted R-squared:  0.8917
F-statistic: 29.82 on 2 and 5 DF, p-value: 0.001664

```

FIG. S 14: RESULTS OF THE MULTILINEAR REGRESSION  $RS = F(\text{TEMPERATURE, FLOW VELOCITY})$
